# Supplementary material for: A superhydrophobic hyper-cross-linked polymer synthesized at room temperature used as an efficient adsorbent for volatile organic compounds
Source: Royal Society of Chemistry journal article supplement (doi:10.1039/c6ra18687d), 2016-01-01
Supplement: c6ra18687d1.pdf [file c6ra18687d1.pdf]

## Supporting Information

### Superhydrophobic Hyper-Cross-linked Polymer Synthesized at a Room Temperature as Efficient Adsorbent for Volatile Organic Compounds

Junhui Wang,<sup>a,c†</sup> Wan-Qiu Wang,<sup>b†</sup> Zhengping Hao,<sup>a</sup> Gang Wang,<sup>a,c</sup> Yang Li,<sup>a,c</sup> Jian-

Gang Chen,<sup>b</sup> Miaomiao Li,<sup>a</sup> Jie Cheng<sup>\*,a</sup> and Zhao-Tie Liu<sup>\*,b</sup>

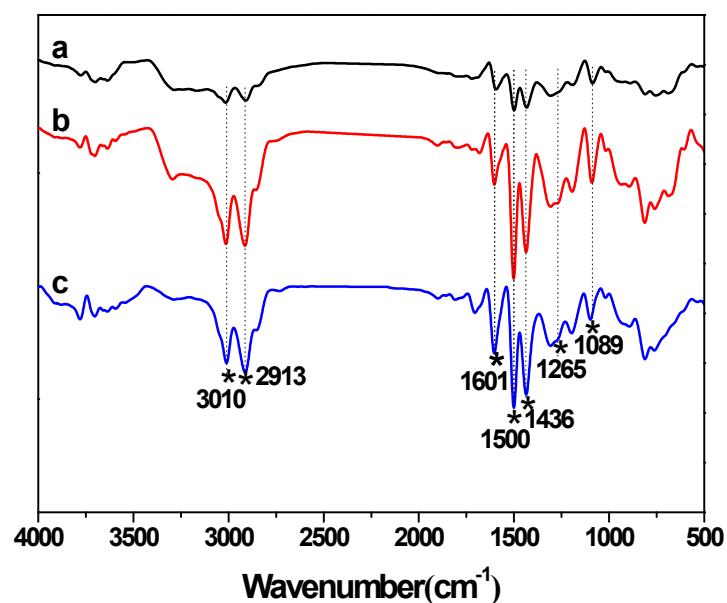

**Figure S1.** FT-IR spectra for CIBE-0.5 (a), CIBE-1.0 (b), CIBE-1.5 (c).

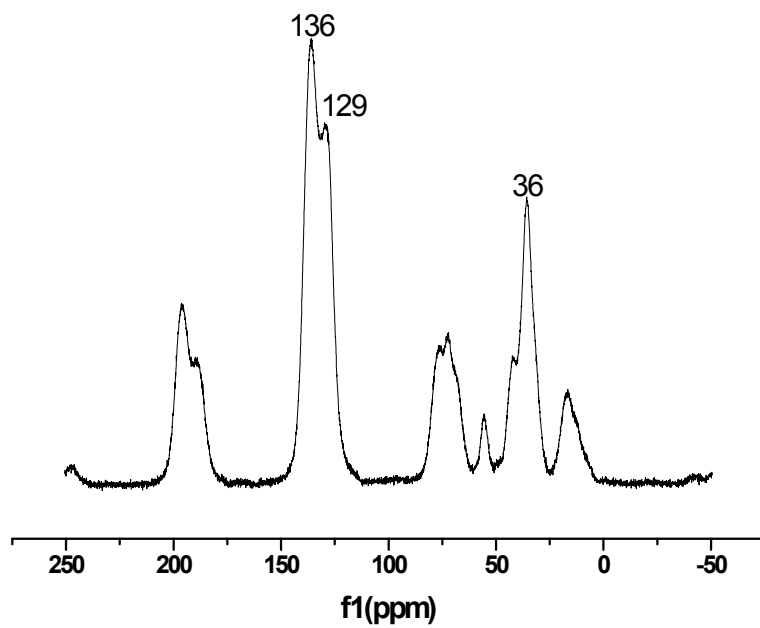

**Figure S2.** Cross-polarization (CP)  $^{13}\text{C}$  MAS natural abundance NMR spectrum of CIBE-1.5.

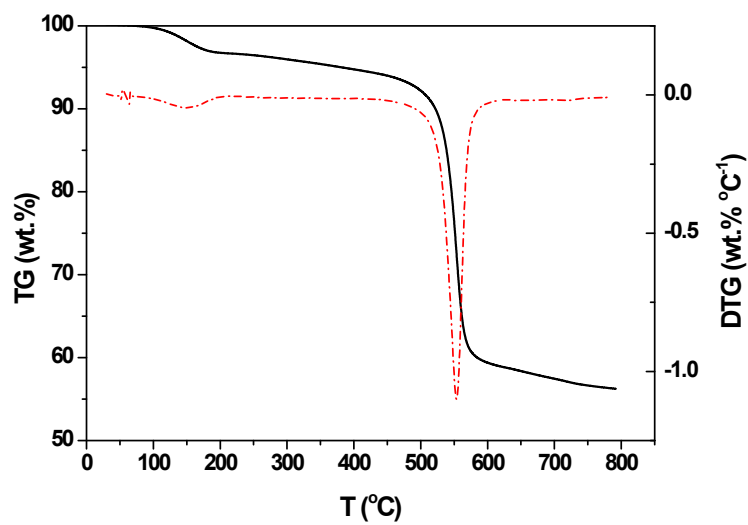

**Figure S3.** TG and DTG curves for CIBE-1.5.

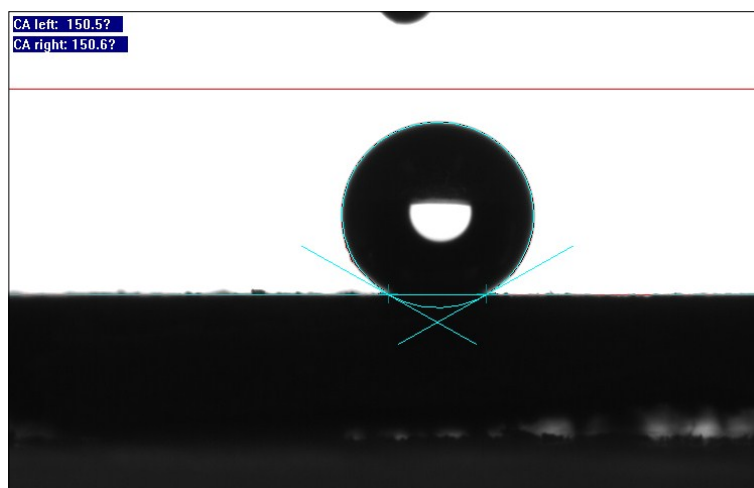

Figure S4. Water contact angle on CIBE-1.5.

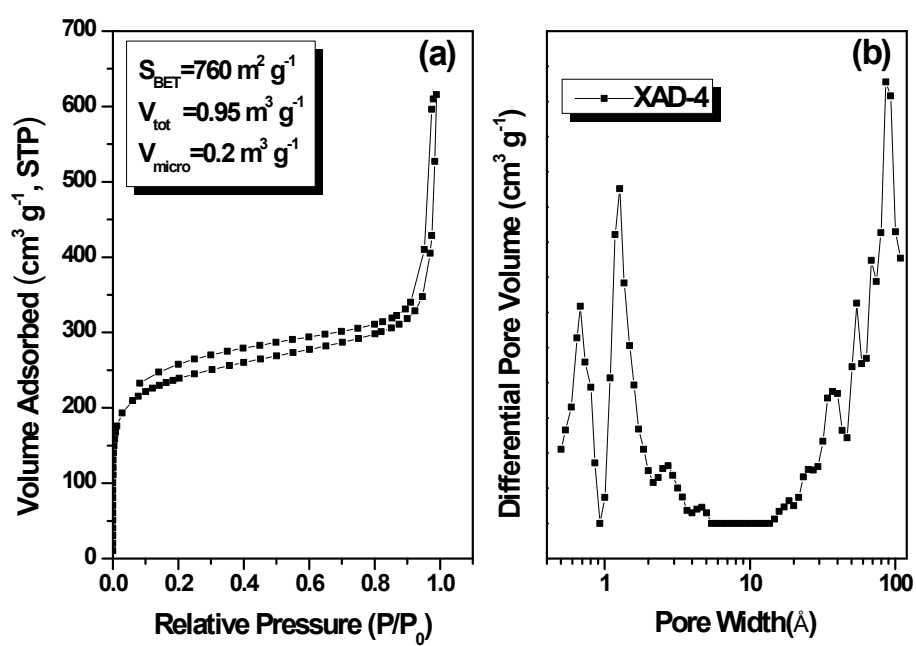

Figure S5. Nitrogen sorption isotherms of XAD-4 (a) and pore size distribution calculated using DFT methods (b).

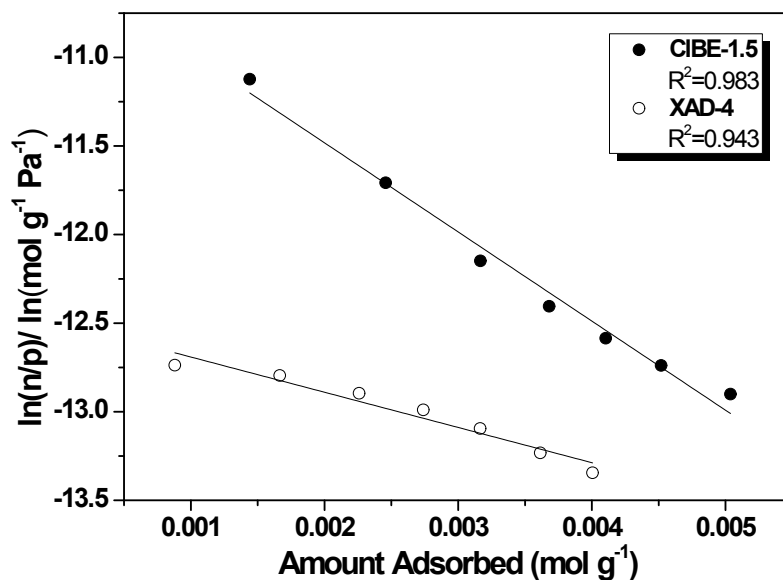

Figure S6. Virial graphs for benzene on CIBE-1.5 and XAD-4 at 25°C.

Table S1. Dynamic adsorption capacities of CIBE-1.5 and XAD-4 and breakthrough characteristics of benzene adsorption calculated from Y-N model

| Material | RH=0%                          |                   |       | RH=80%                         |                   |       | Breakthrough time<br>(min)<br>(RH=80%) | $Q_{wet}/Q_{dry}$ |
|----------|--------------------------------|-------------------|-------|--------------------------------|-------------------|-------|----------------------------------------|-------------------|
|          | $Q$<br>(mmol g <sup>-1</sup> ) | $\tau_0$<br>(min) | $R^2$ | $Q$<br>(mmol g <sup>-1</sup> ) | $\tau_0$<br>(min) | $R^2$ |                                        |                   |
| CIBE-1.5 | 1.91                           | 103.95            | 0.996 | 1.86                           | 101.68            | 0.989 | 28.18                                  | 97%               |
| XAD-4    | 1.48                           | 80.61             | 0.985 | 0.85                           | 44.45             | 0.997 | 6.27                                   | 57%               |
